# Supplementary material for: The morphospace of language networks
Source: PubMed Central journal article supplement (PMC6041342; doi:10.1038/s41598-018-28820-0), 2018-07-11

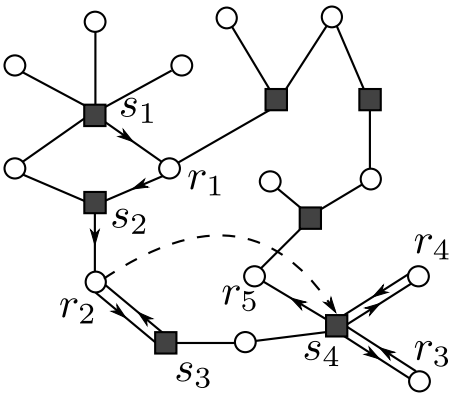

Supplement: 41598_2018_28820_MOESM2_ESM.pdf [file 41598_2018_28820_MOESM2_ESM.pdf]
